# Supplementary material for: Conserved and novel enhancers in the Aedes aegypti single-minded locus recapitulate embryonic ventral midline gene expression
Source: PLOS journal article supplement (doi:10.1371/journal.pgen.1010891), 2024-04-29

Supplementary Figure 4

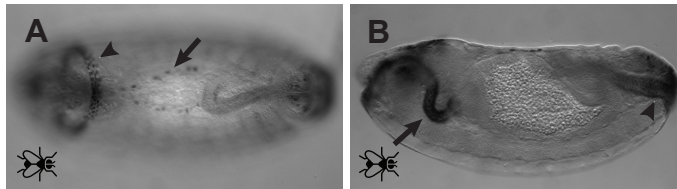

Supplement: S4 (10.1371/journal.pgen.1010891.s004) [file journal.pgen.1010891.s004]
